# Supplementary material
Source: PubMed Central journal article supplement (PMC5548537)
Supplement: NIHMS875155-supplement-Supplementary_Figures.pdf [file NIHMS875155-supplement-Supplementary_Figures.pdf]

# Supplementary Figure 1

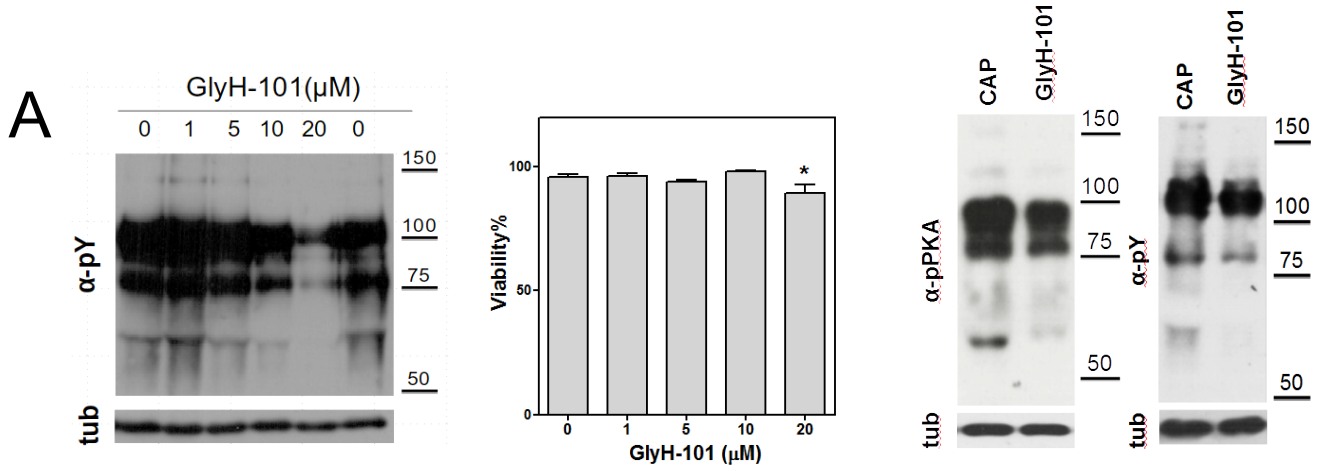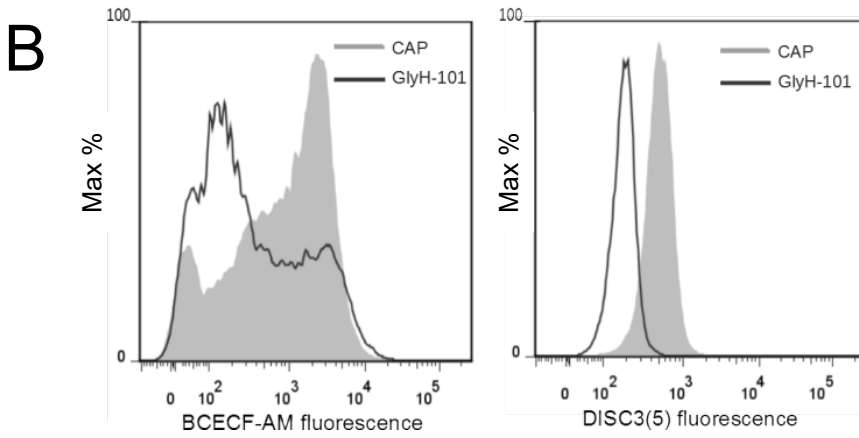

**C**

|         | Relative median<br>BCECF-AM<br>fluorescence | Relative median<br>DISC <sub>3</sub> (5)<br>fluorescence |
|---------|---------------------------------------------|----------------------------------------------------------|
| GlyH101 | 0,54±0,12<br>*                              | 0,42±0,10<br>**                                          |

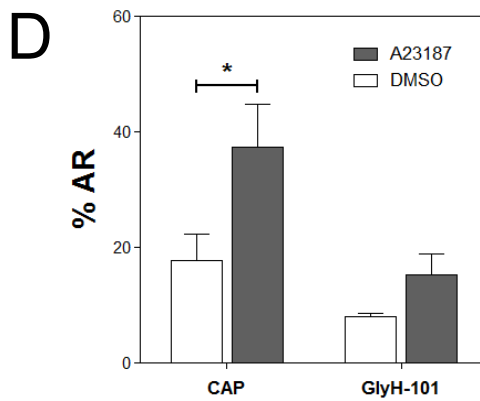

## Supplementary Figure 2

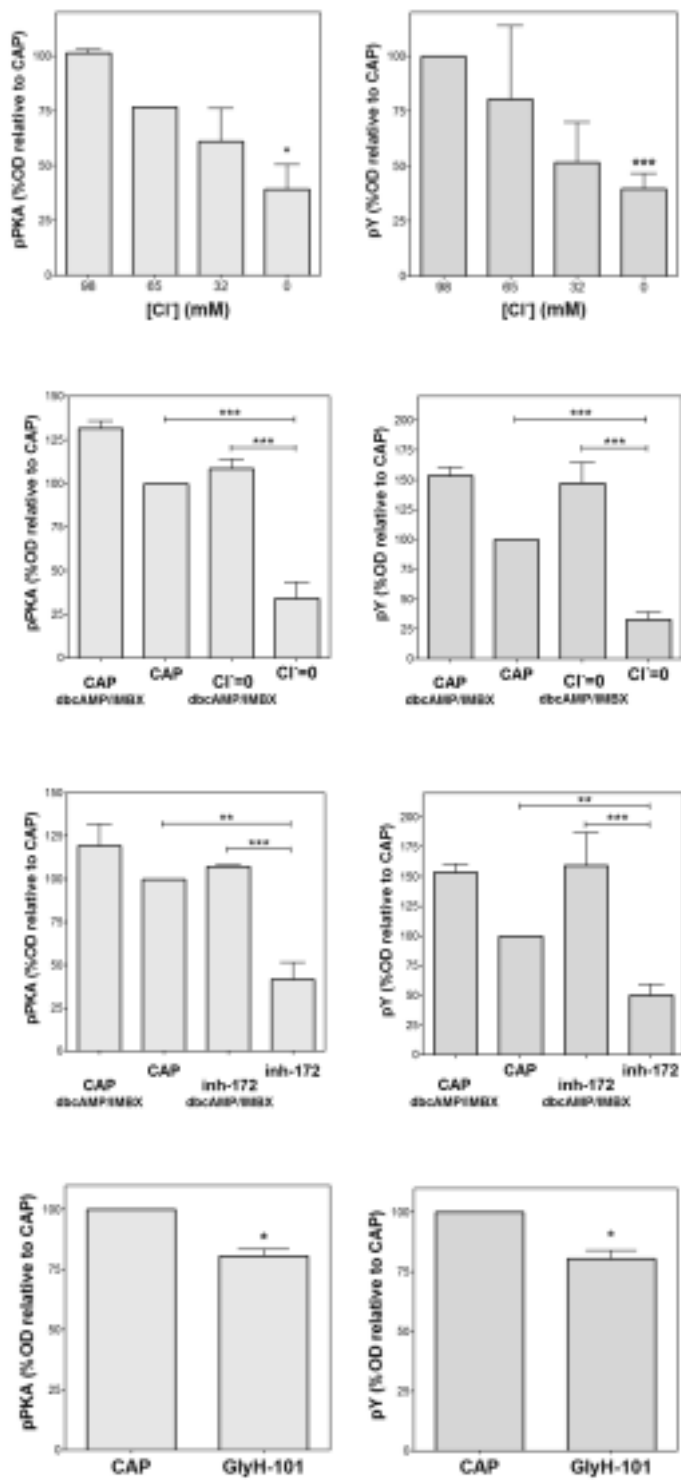

Supplementary Figure 3

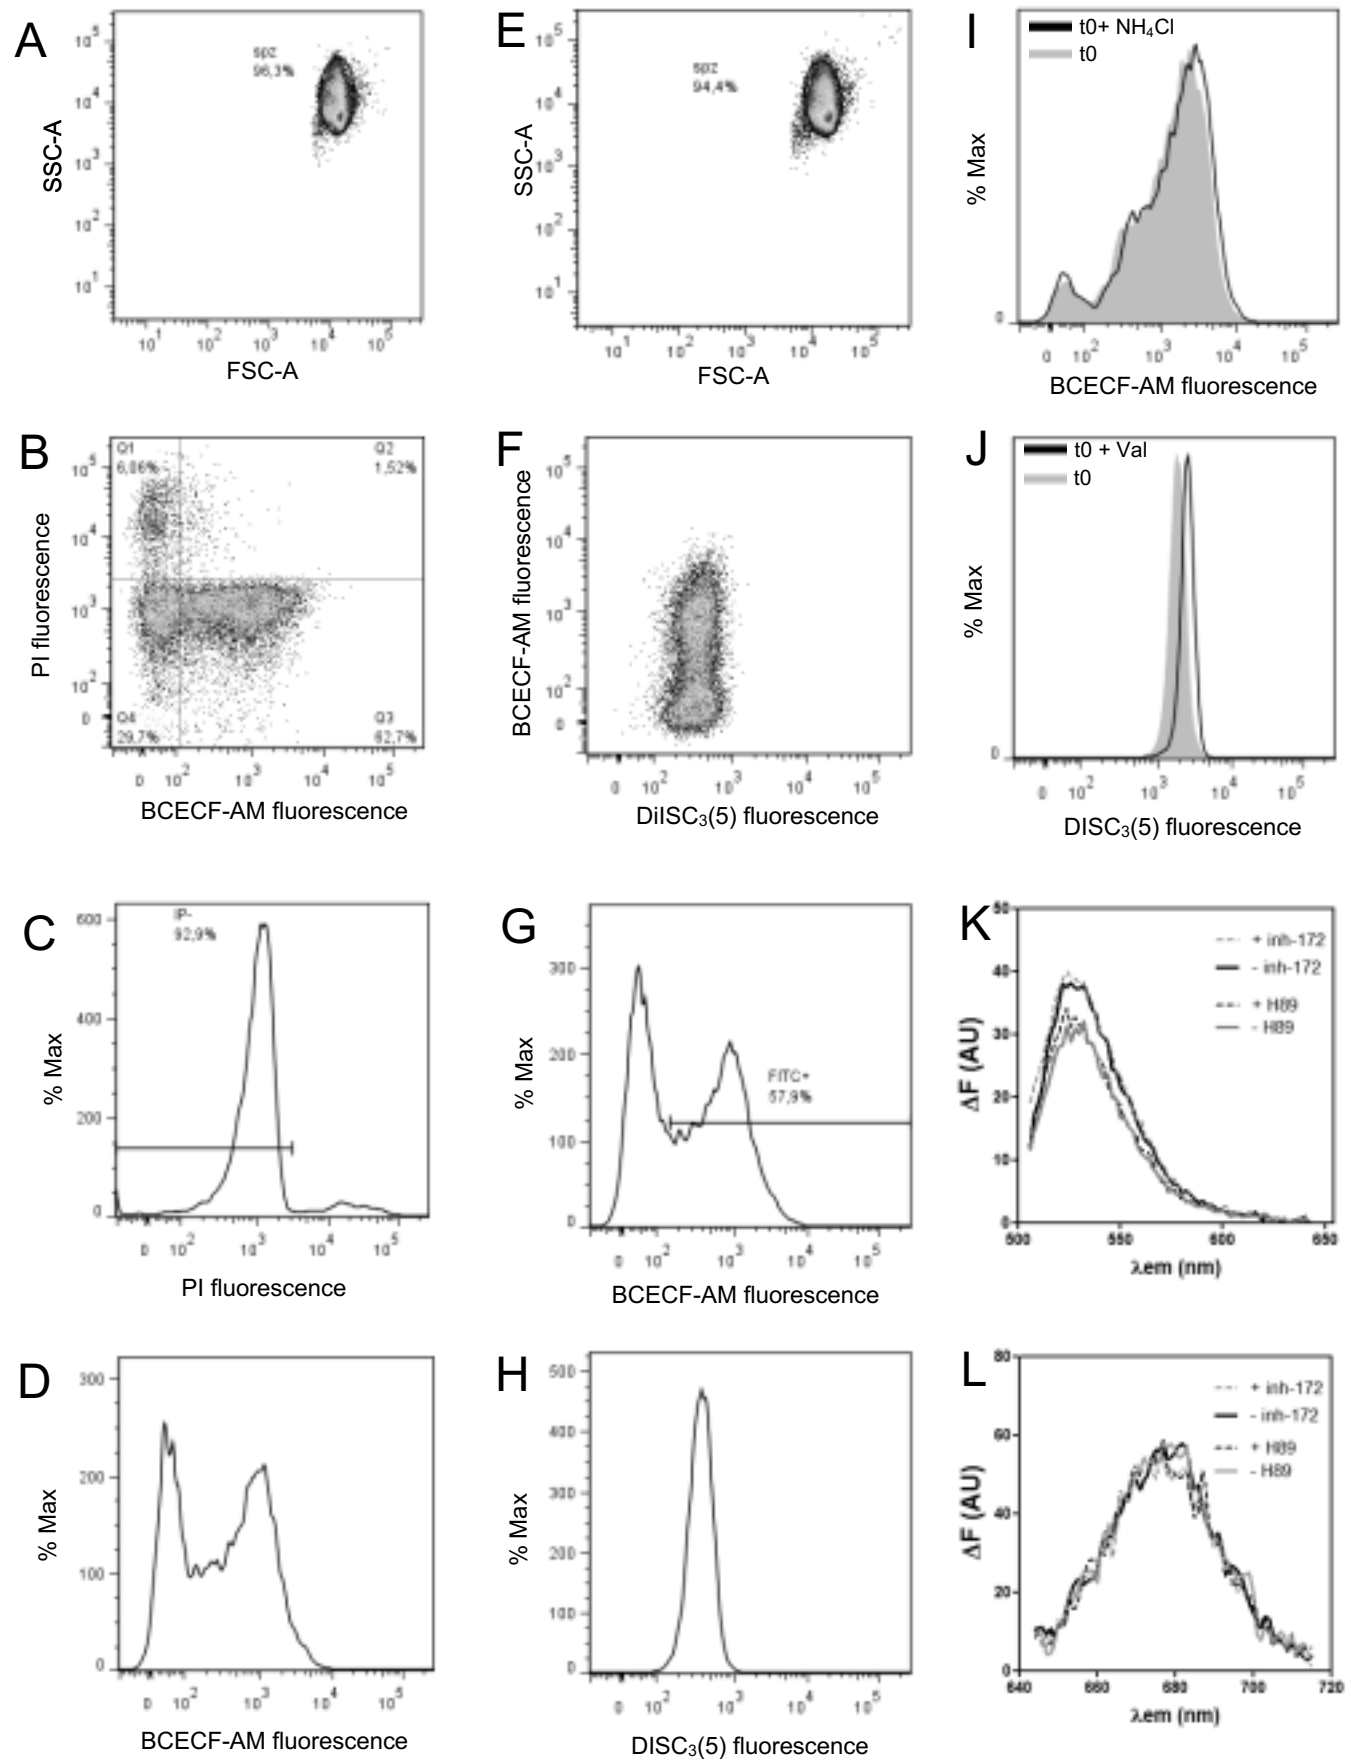

Supplementary Figure 4

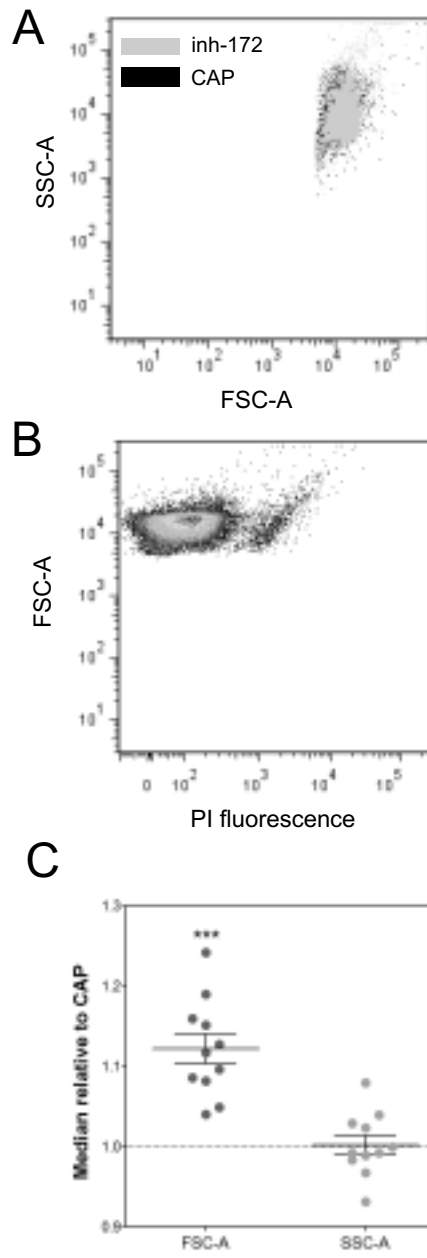

Supplementary Figure 5

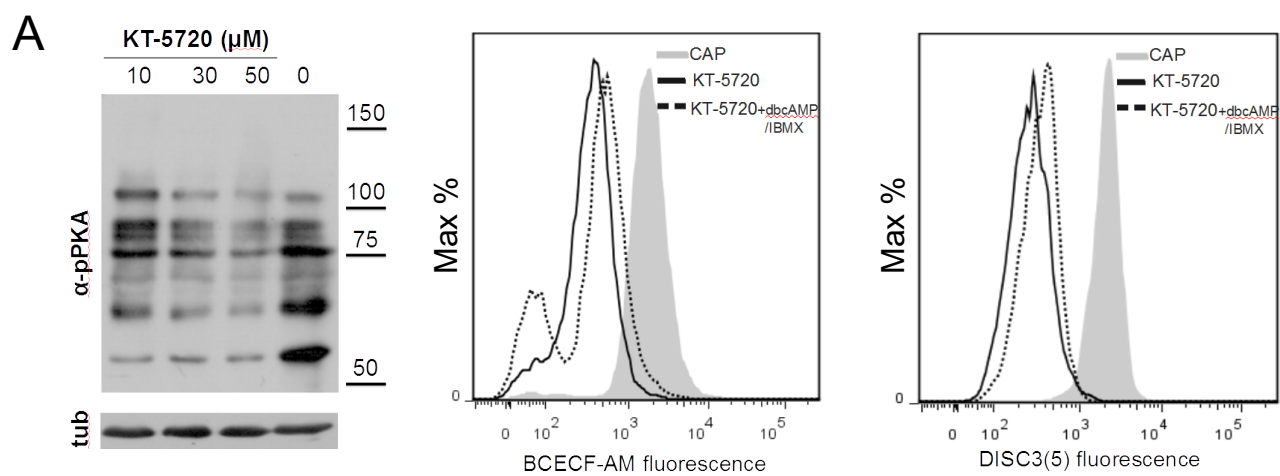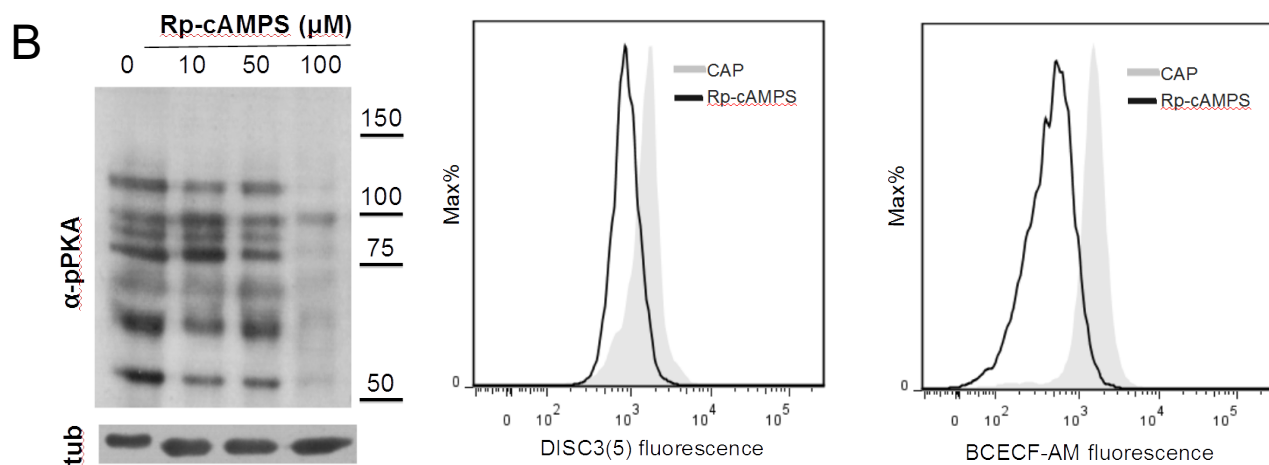

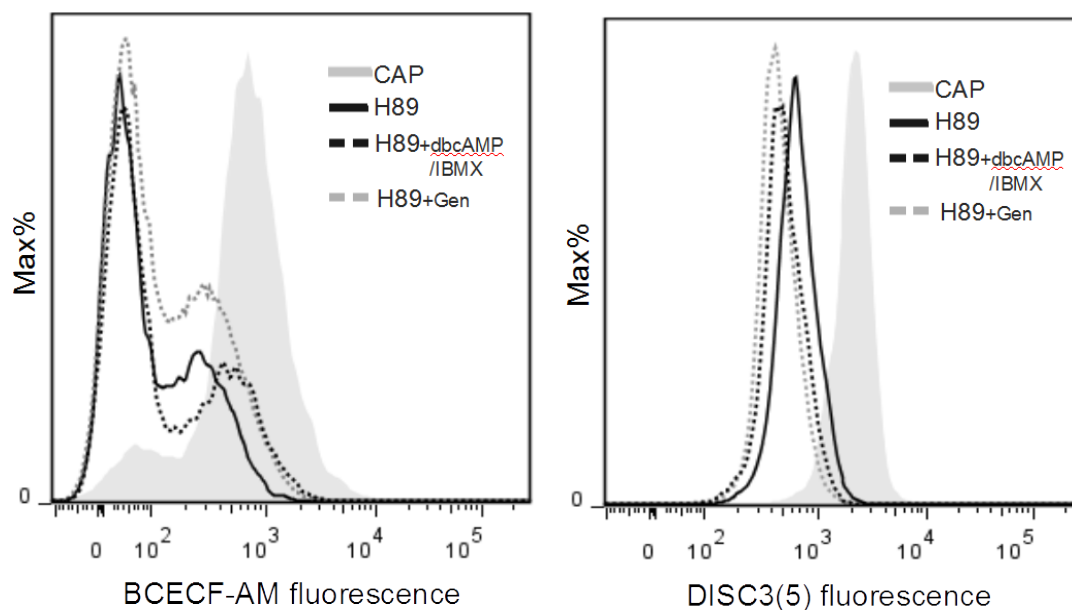

**Supplementary Figure for review (not to be included in the manuscript):**

**Effect of genistein and H89 on pHi and Em.** Human sperm were incubated for 5 hour in media that supports capacitation in the absence (CAP) or presence of H89 (30  $\mu$ M, solid line). Subsequently, aliquots from each condition were processed by flow cytometry to evaluate pHi with BCECF-AM probe and Em with DiSC<sub>3</sub>(5). Addition of dbcAMP 1mM and IBMX 0.2 mM (black dotted lines) or genistein 5  $\mu$ M (gray dotted lines) did not rescue both, the acidification and depolarization produced by H89. (n=3)
